# Supplementary material
Source: Frontiers journal article supplement (https://www.frontiersin.org/articles/123291)
Supplement: Presentation_1.PDF [file Presentation_1.PDF]

*Supplementary Material***Double sampling with multiple imputation to answer large sample meta-research questions: Introduction and illustration by evaluating adherence to two simple CONSORT guidelines****Patrice L. Capers<sup>1</sup>, Andrew W. Brown<sup>1</sup>, John A. Dawson<sup>1,2</sup>, David B. Allison<sup>1,2,3,4\*</sup>**<sup>1</sup>School of Public Health, Office of Energetics and Nutrition Obesity Research Center, University of Alabama at Birmingham, Birmingham, AL, USA<sup>2</sup>Section on Statistical Genetics, University of Alabama at Birmingham, Birmingham, AL, USA<sup>3</sup>Department of Nutrition Sciences, University of Alabama at Birmingham, Birmingham, AL, USA<sup>4</sup>Department of Biostatistics, University of Alabama at Birmingham, Birmingham, AL, USA**\* Correspondence:** Dr. David B. Allison, University of Alabama at Birmingham, 1665 University Blvd, RPHB140J, Birmingham, AL 35294 – 0022.[dallison@uab.edu](mailto:dallison@uab.edu)**1. Supplementary Data****2. Supplementary Figures and Tables****2.1. Supplementary Tables****Table S1. Words using the R<sub>LO</sub>T<sub>HI</sub> method for structured abstracts.**

| Abstract heading | Words*                                                                                                           |
|------------------|------------------------------------------------------------------------------------------------------------------|
| Introduction     | Problem, context, rationale, background, purpose, objective, aims, introduction, hypothesis, goals               |
| Methods          | Design, methods, methodology, method, setting, participants, interventions, patients, subjects, outcome measures |
| Results          | Results                                                                                                          |
| Conclusion       | Discussion, conclusion, clinical significance, level of evidence, interpretation                                 |

\* The words used in the search were entered as regular expressions in R, with all search terms and abstract text changed to lower case. Search behavior in other systems (e.g., PubMed) may be different.

**Table S2. Characterization of places published.**

| Group                            | Total   | Subsample | Subsample (RCTs only) | Countries         |
|----------------------------------|---------|-----------|-----------------------|-------------------|
| United States (US)               | 164,491 | 257       | 209                   | United States     |
| English Speaking Countries (ESC) | 94,501  | 151       | 120                   | Canada<br>Ireland |

|               |        |    |    |                                                                                                                                                                                                                                                                                                                                                                                                                                                           |
|---------------|--------|----|----|-----------------------------------------------------------------------------------------------------------------------------------------------------------------------------------------------------------------------------------------------------------------------------------------------------------------------------------------------------------------------------------------------------------------------------------------------------------|
|               |        |    |    | Jamaica<br>New Zealand<br>Australia<br>England<br>Wales<br>Scotland<br>Northern Ireland<br>Kenya<br>Malawi<br>Nigeria<br>Uganda<br>Zimbabwe                                                                                                                                                                                                                                                                                                               |
| Others (NESC) | 62,877 | 92 | 70 | Argentina<br>Austria<br>Bangladesh<br>Belgium<br>Bosnia And<br>Hercegovina<br>Brazil<br>Bulgaria<br>Chile<br>China<br>Colombia<br>Croatia<br>Czech Republic<br>Czechoslovakia<br>Denmark<br>Egypt<br>Ethiopia<br>Finland<br>France<br>Georgia (Republic)<br>Germany<br>Germany, East<br>Germany, West<br>Ghana<br>Greece<br>Hong Kong<br>Hungary<br>India<br>Indonesia<br>Iran<br>Israel<br>Italy<br>Japan<br>Korea<br>Korea (South)<br>Kuwait<br>Lebanon |

|  |  |  |  |                                                                                                                                                                                                                                                                                                                                                                                                                                                                                                                                           |
|--|--|--|--|-------------------------------------------------------------------------------------------------------------------------------------------------------------------------------------------------------------------------------------------------------------------------------------------------------------------------------------------------------------------------------------------------------------------------------------------------------------------------------------------------------------------------------------------|
|  |  |  |  | Lithuania<br>Luxembourg<br>Macedonia<br>Malaysia<br>Mexico<br>Nepal<br>Netherlands<br>Norway<br>Pakistan<br>Papua New Guinea<br>Peru<br>Philippines<br>Poland<br>Portugal<br>Puerto Rico<br>Romania<br>Russia (Federation)<br>Saudi Arabia<br>Senegal<br>Serbia<br>Serbia And<br>Montenegro<br>Singapore<br>Slovakia<br>Slovenia<br>South Africa<br>Spain<br>Sri Lanka<br>Sweden<br>Switzerland<br>Taiwan<br>Tanzania<br>Thailand<br>Tunisia<br>Turkey<br>Ukraine<br>United Arab Emirates<br>Uruguay<br>Venezuela<br>Yugoslavia<br>Zambia |
|--|--|--|--|-------------------------------------------------------------------------------------------------------------------------------------------------------------------------------------------------------------------------------------------------------------------------------------------------------------------------------------------------------------------------------------------------------------------------------------------------------------------------------------------------------------------------------------------|
